# Supplementary material
Source: HighWire-hosted journal article supplement (https://bmjopen.bmj.com/content/9/5/e027019)
Supplement: inline-supplementary-material-1 [file inline-supplementary-material-1.pdf]

1 **Appendix**

2 **Supplementary Table 1. Hazard ratios (HRs) for all-cause and cause specific mortality by handgrip**  
 3 **strength in gender-specific samples of the Korean Longitudinal Study of Ageing, 2006-2014**

| Handgrip strength          | Hazard ratios (95% CI) |                      |
|----------------------------|------------------------|----------------------|
|                            | Men (N=2,668)          | Women (N=3,191)      |
| <b>All-cause mortality</b> |                        |                      |
| Per 1-kg decrement         | 1.05 (1.03 to 1.08)    | 1.06 (1.02 to 1.09)  |
| Tertiles                   |                        |                      |
| Highest (Strong)           | 1.00 (Reference)       | 1.00 (Reference)     |
| Middle (moderate)          | 1.60 (1.16 to 2.22)    | 2.29 (0.31 to 16.89) |
| Lowest (Weak)              | 2.26 (1.49 to 3.43)    | 2.65 (0.37 to 19.19) |
| <b>CVD mortality</b>       |                        |                      |
| Per 1-kg decrement         | 1.02 (0.99 to 1.04)    | 1.04 (0.99 to 1.08)  |
| Tertiles                   |                        |                      |
| Highest (Strong)           | 1.00 (Reference)       | 1.00 (Reference)     |
| Middle (moderate)          | 1.67 (1.05 to 2.65)    | 1.56 (0.21 to 11.64) |
| Lowest (Weak)              | 1.19 (0.83 to 1.70)    | 2.49 (0.34 to 18.13) |
| <b>Cancer mortality</b>    |                        |                      |
| Per 1-kg decrement         | 1.01 (0.99 to 1.03)    | 1.02 (0.97 to 1.07)  |
| Tertiles                   |                        |                      |
| Highest (Strong)           | 1.00 (Reference)       | 1.00 (Reference)     |
| Middle (moderate)          | 1.01 (0.76 to 1.32)    | 0.56 (0.13 to 2.49)  |
| Lowest (Weak)              | 1.09 (0.73 to 1.62)    | 1.38 (0.33 to 5.76)  |

4 Note: 95% CI = 95% confidence interval

5 Adjusted for baseline age, sex, education, quartiles of total household income, time-varying smoking status,  
 6 physical activity, alcohol consumption, obesity, self-reported doctor diagnosis of comorbidities, depressive  
 7 symptoms, K-MMSE score and engagement in social activities.
